# Supplementary material for: Loss of Yes-associated Protein Represents an Aggressive Subtype of Colorectal Cancer
Source: PubMed Central journal article supplement — J Cancer. 2019 Jan 1;10(3):689–96. doi: 10.7150/jca.28333 (PMC6360423; doi:10.7150/jca.28333), 2019-01-01
Supplement: jcav10p0689s1.pdf [file jcav10p0689s1.pdf]

Kaplan-Meier analysis for proximal tumors

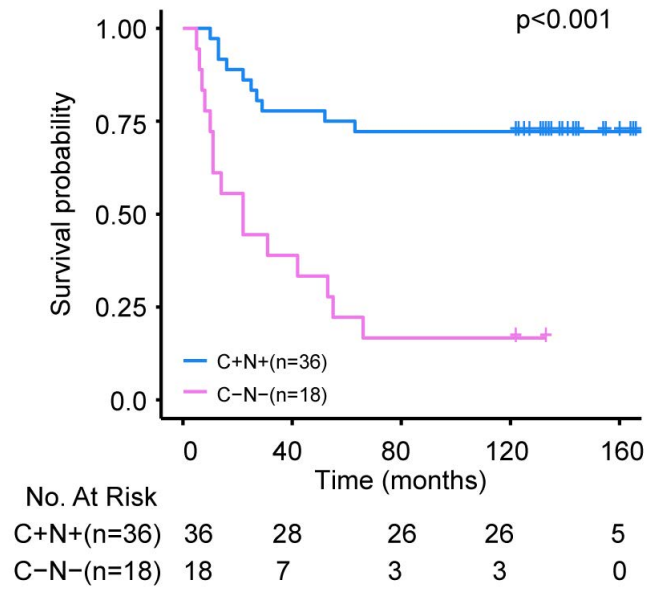

**Figure S1. Kaplan-Meier survival curves for proximal CRC patients**

C+N+: cytoplasmic positive and nuclear positive; C-N-: complete loss of YAP expression.
